# Supplementary material for: Bucking the Trend in Wolf-Dog Hybridization: First Evidence from Europe of Hybridization between Female Dogs and Male Wolves
Source: PLoS One. 2012 Oct 3;7(10):e46465. doi: 10.1371/journal.pone.0046465 (PMC3463576; doi:10.1371/journal.pone.0046465)

**Fig. S1.** Distribution of allele frequencies at 11 autosomal microsatellite loci in 74 grey wolves from the Estonian-Latvian wolf population (blue bars), 21 pure-bred dogs (red bars) and eight wolf-dog hybrids (green bars) from Estonia and Latvia. The horizontal scales indicate the molecular weights in base pair lengths of the different alleles; vertical scales indicate the relative allele frequencies. Most pronounced alleles exhibited by hybrids and also found in wolves but absent in dogs, and *vice versa*, are surrounded.

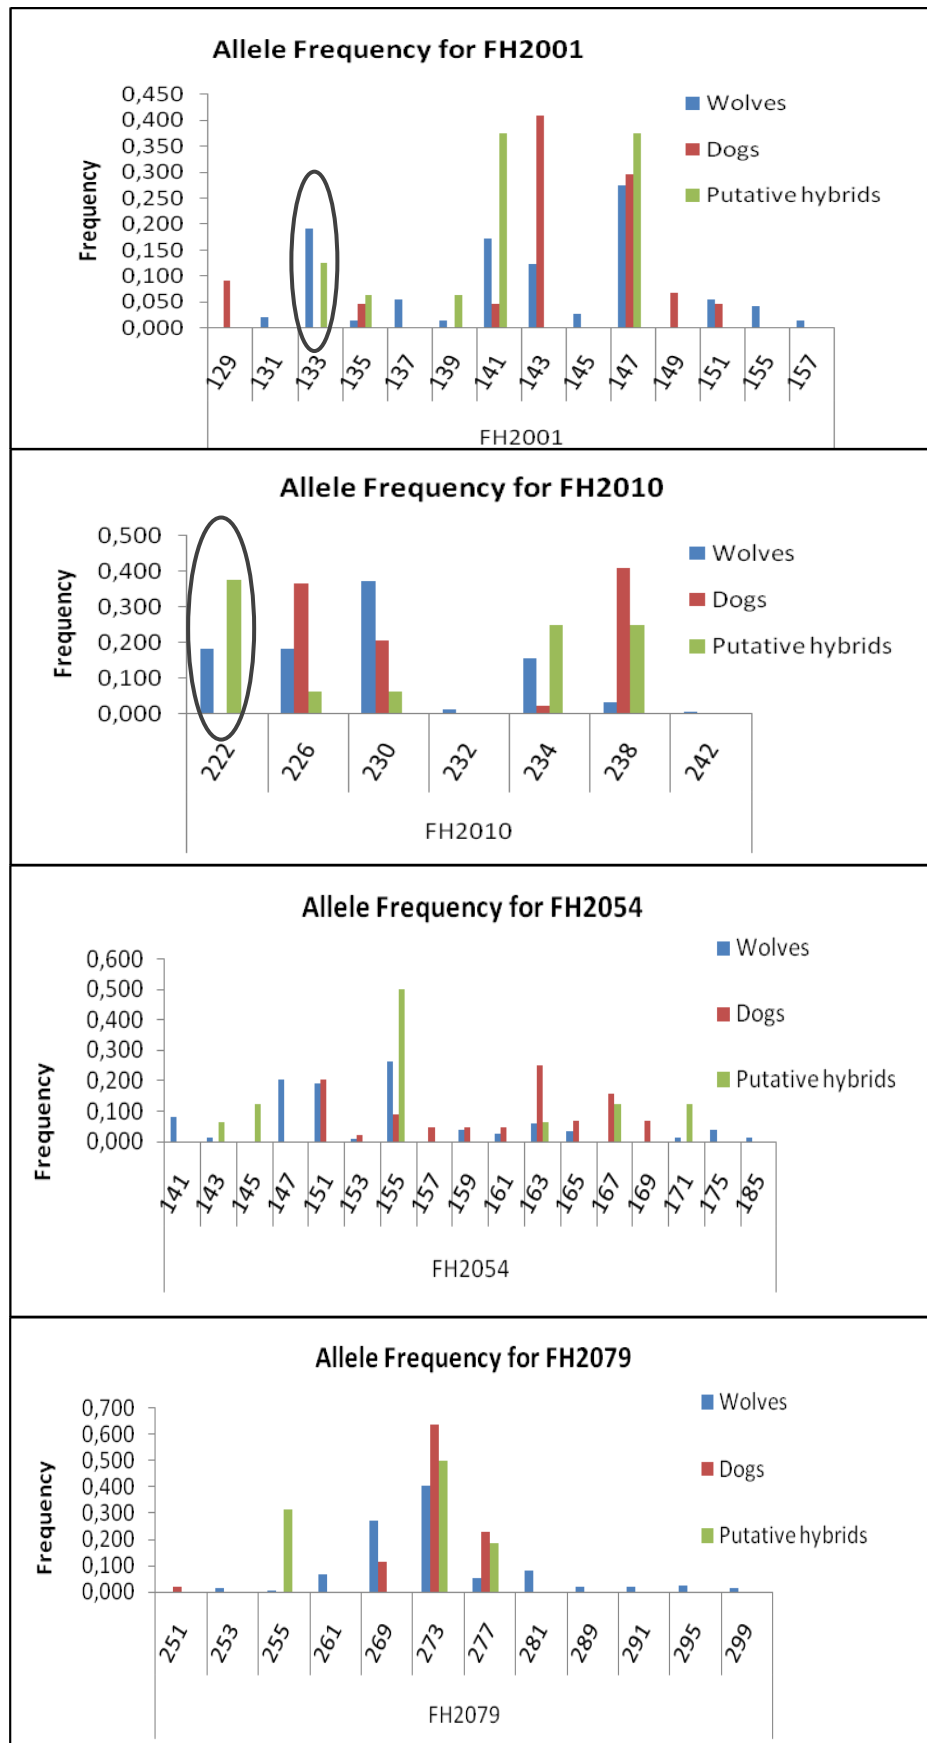

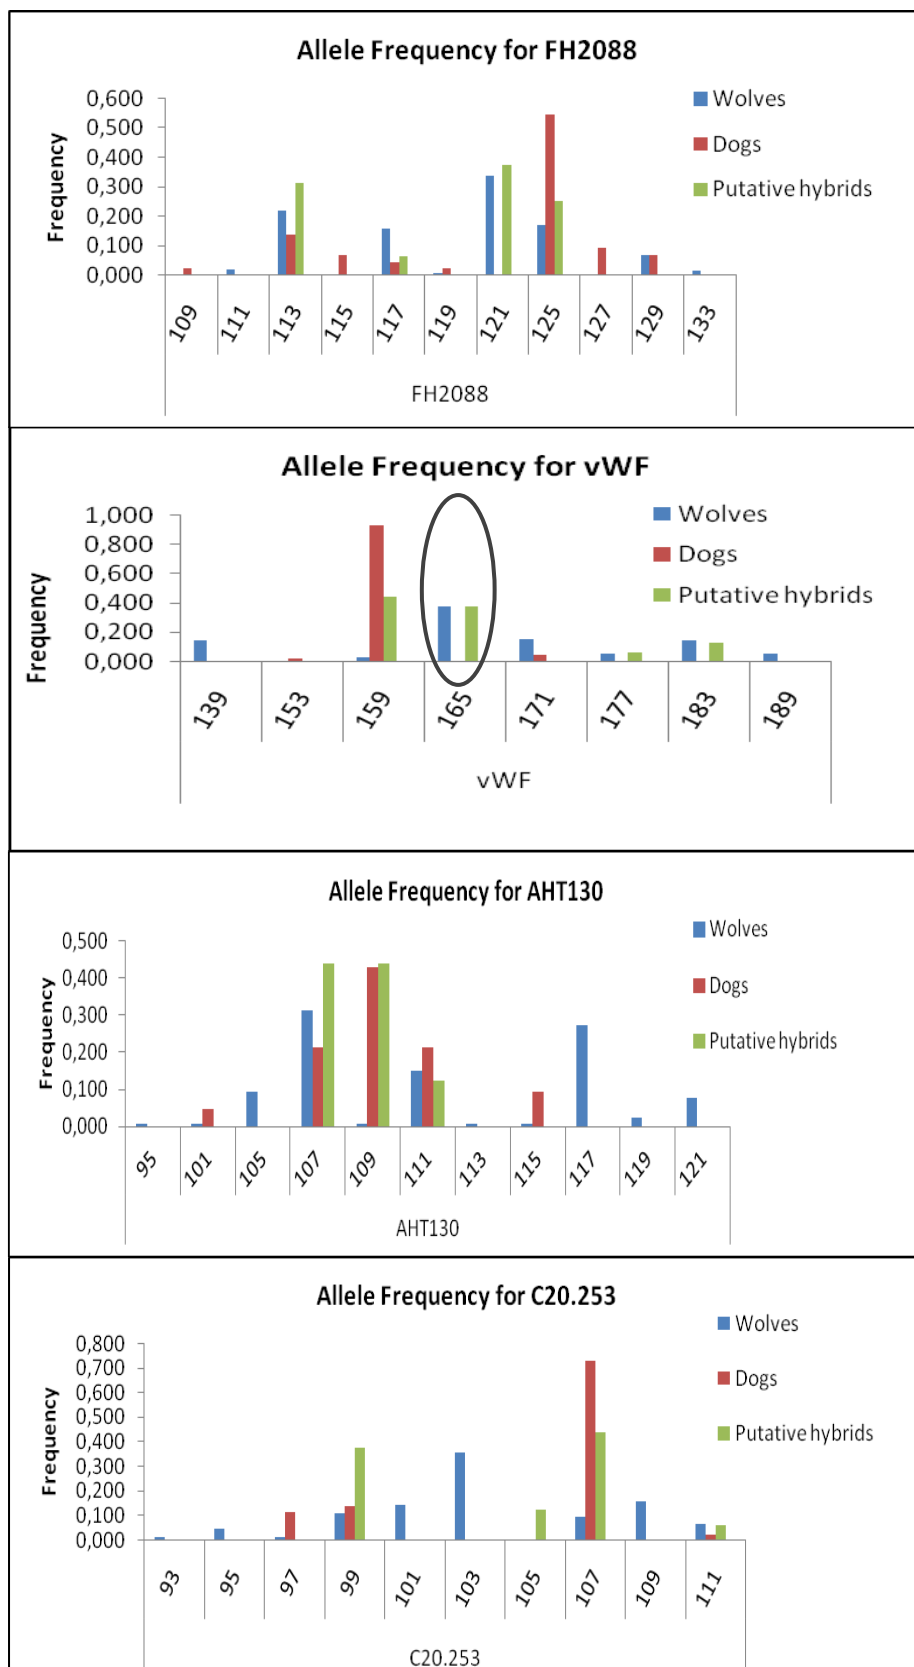

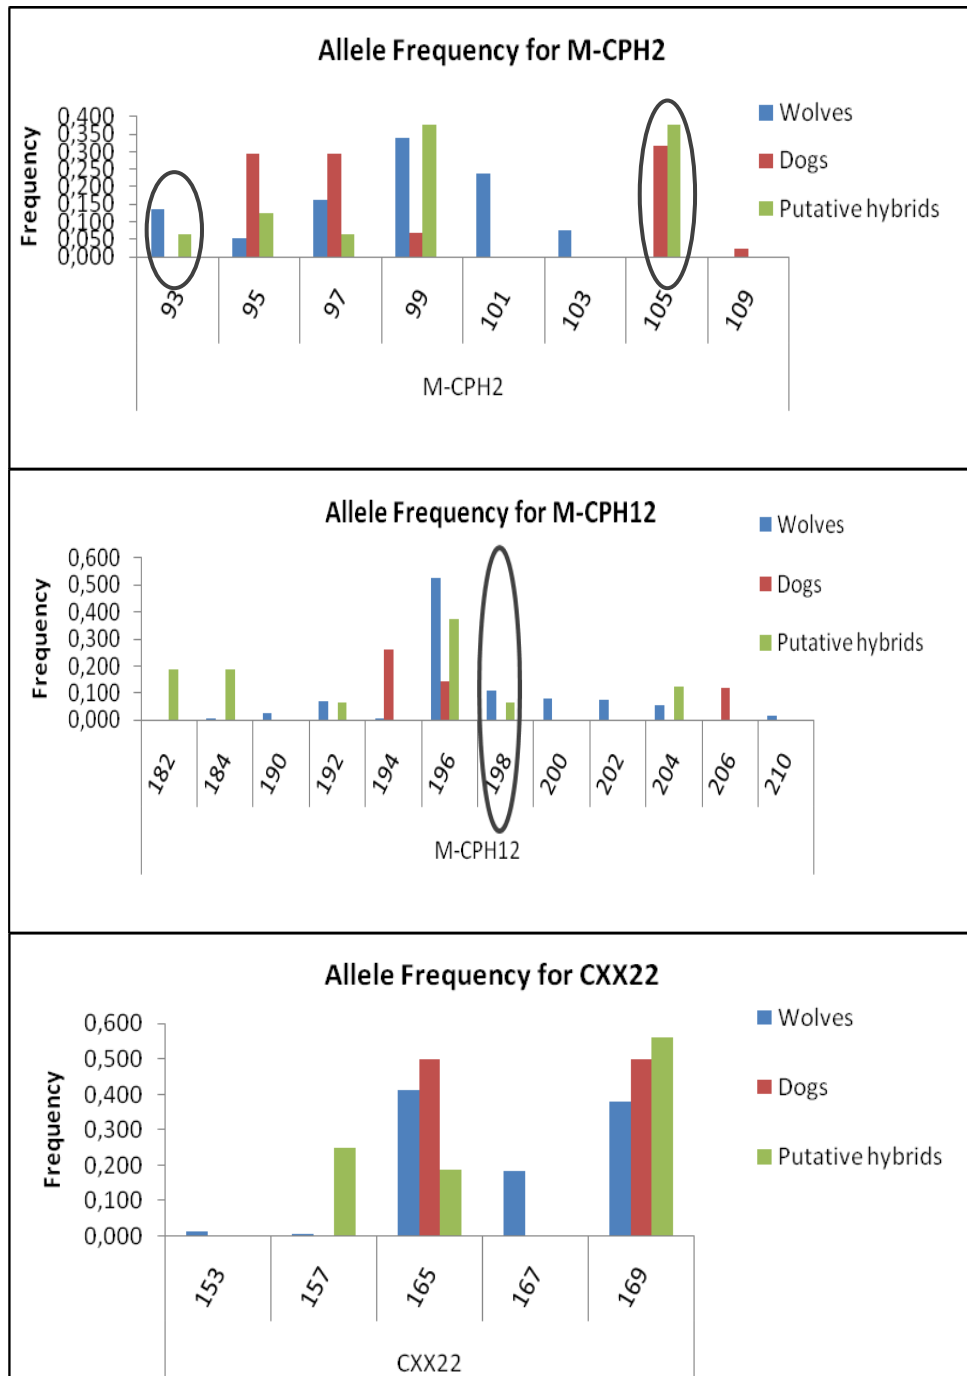

Supplement: Figure S1 — Distribution of allele frequencies at 11 autosomal microsatellite loci in 74 wolves from Estonia and Latvia (blue bars), 21 pure-bred dogs (red bars) and eight wolf-dog hybrids (green bars) from Estonia and Latvia. The horizontal scales indicate base pair lengths of the different alleles; vertical scales indicate the relative allele frequencies. The most pronounced alleles exhibited by hybrids and also found in wolves but absent in dogs, and vice versa, are circled. (PDF) [file pone.0046465.s001.pdf]
