# Supplementary material for: Bucking the Trend in Wolf-Dog Hybridization: First Evidence from Europe of Hybridization between Female Dogs and Male Wolves
Source: PLoS One. 2012 Oct 3;7(10):e46465. doi: 10.1371/journal.pone.0046465 (PMC3463576; doi:10.1371/journal.pone.0046465)
Supplement: Table S3 — Wolves, dogs and wolf-dog hybrids used for Bayesian phylogenetic analysis (based on partial mtDNA control region sequences, 1134 bp; Fig. 5 ). (XLS) [file pone.0046465.s004.xls]

## Sheet: Sheet1
	Haplotypes names in Fig. 6	Breed for dogs, and country for wolves and wolf-dog hybrids	Accession nr. in GenBank	References
Dogs	husky1	Husky	AB499817	Ishiguro (unpublished)
	kisyu	Kisyu	AB499816	Ishiguro (unpublished)
	y-chihuahua	Yorkie Chihuahua	EU408308	Webb and Allard 2009
	9	West Highland White Terrier	EU408306	Webb and Allard 2009
	1	Vizsla	EU408305	Webb and Allard 2009
	1	Toy Poodle	EU408302	Webb and Allard 2009
	10	Rottweiler	EU408295	Webb and Allard 2009
	10	Rottweiler	EU408296	Webb and Allard 2009
	tib-spaniel	Tibetan Spaniel	EU408301	Webb and Allard 2009
	tib-mastiff	Tibetan Mastiff	EU408300	Webb and Allard 2009
	7	Schnauzer	EU408299	Webb and Allard 2009
	1	Sheltie	EU408298	Webb and Allard 2009
	schipperke	Schipperke	EU408297	Webb and Allard 2009
	pit bull	Pit Bull Terrier	EU408293	Webb and Allard 2009
	3	Pug	EU408294	Webb and Allard 2009
	poodle1	Poodle	EU408292	Webb and Allard 2009
	15	Pomeranian	EU408291	Webb and Allard 2009
	5	Neopolitan Mastiff	EU408289	Webb and Allard 2009
	5	Neopolitan Mastiff	EU408290	Webb and Allard 2009
	9	Newfoundland	EU408287	Webb and Allard 2009
	10	Miniature Daschund	EU408286	Webb and Allard 2009
	13	Labradoodle	EU408285	Webb and Allard 2009
	keeshond1-3	Keeshond	EU408282	Webb and Allard 2009
	keeshond1-3	Keeshond	EU408283	Webb and Allard 2009
	keeshond1-3	Keeshond	EU408284	Webb and Allard 2009
	1	Jack Russell Terrier	EU408281	Webb and Allard 2009
	15	Havanese	EU408279	Webb and Allard 2009
	13	Great Pyrenees	EU408278	Webb and Allard 2009
	2	German Shepherd	EU408277	Webb and Allard 2009
	7	Standard Schnauzer	AY656746	Shahid et al. (unpublished)
	10	English Springer Spaniel	AY656745	Shahid et al. (unpublished)
	11	English Springer Spaniel	AY656744	Shahid et al. (unpublished)
	13	Saint Bernard	AY656743	Shahid et al. (unpublished)
	oe-sheepdog	Old English Sheepdog	AY656742	Shahid et al. (unpublished)
	i-setter1	Irish Setter	AY656741	Shahid et al. (unpublished)
	13	Kerry Blue Terrier	AY656740	Shahid et al. (unpublished)
	13	Poodle	AY656739	Shahid et al. (unpublished)
	3	Jack Russell Terrier	AY656738	Shahid et al. (unpublished)
	basenji	Basenji	AY656737	Shahid et al. (unpublished)
	ger-shepherd2	German Shepherd	DQ480489	Bjornerfeldt, Webster and Vilà 2006
	2	Sapsaree	AY656755	Shahid et al. (unpublished)
	chi-crested	Chinese Crested Dog	AY656754	Shahid et al. (unpublished)
	10	Irish Setter	AY656753	Shahid et al. (unpublished)
	schnauzer3	Schnauzer	AY656752	Shahid et al. (unpublished)
	g-setter	Gordon Setter	AY656751	Shahid et al. (unpublished)
	7	Leonberger	AY656750	Shahid et al. (unpublished)
	5	Saint Bernard	AY656749	Shahid et al. (unpublished)
	3	Airedale Terrier	AY656748	Shahid et al. (unpublished)
	1	Welsh Springer Spaniel	AY656747	Shahid et al. (unpublished)
	15	Swedish Elkhound	DQ480501	Bjornerfeldt, Webster and Vilà 2006
	13	Shetland Sheepdog	DQ480500	Bjornerfeldt, Webster and Vilà 2006
	husky2	Siberian Husky	DQ480499	Bjornerfeldt, Webster and Vilà 2006
	3	Miniature Shnauzer	DQ480498	Bjornerfeldt, Webster and Vilà 2006
	8	West Highland White Terrier	DQ480497	Bjornerfeldt, Webster and Vilà 2006
	9	Irish Soft Coated Wheaten Terrier	DQ480496	Bjornerfeldt, Webster and Vilà 2006
	1	Cocker Spaniel	DQ480495	Bjornerfeldt, Webster and Vilà 2006
	13	Poodle	DQ480494	Bjornerfeldt, Webster and Vilà 2006
	6	Irish Setter	DQ480491	Bjornerfeldt, Webster and Vilà 2006
	11	Flat Coated Retriever	DQ480490	Bjornerfeldt, Webster and Vilà 2006
	15	Blue Heeler	EU408251	Webb and Allard 2009
	3	Bichon Frise	EU408250	Webb and Allard 2009
	10	Australian Shepherd	EU408249	Webb and Allard 2009
	2	Australian Shepherd	EU408248	Webb and Allard 2009
	13	Australian Terrier	EU408247	Webb and Allard 2009
	1	American Cockerspaniel	EU408246	Webb and Allard 2009
	akita	Akita	EU408245	Webb and Allard 2009
	7	Great Dane	EU408276	Webb and Allard 2009
	7	French Bulldog	EU408275	Webb and Allard 2009
	4	English Mastiff	EU408274	Webb and Allard 2009
	e-shepherd	English Shepherd	EU408273	Webb and Allard 2009
	1	Daschund	EU408272	Webb and Allard 2009
	3	Dogue de Bordeaux	EU408271	Webb and Allard 2009
	2	Daschund	EU408270	Webb and Allard 2009
	doberman1	Doberman Pincher	EU408269	Webb and Allard 2009
	cockerspaniel2	Cocker Spaniel	EU408268	Webb and Allard 2009
	15	Cocker Spaniel	EU408267	Webb and Allard 2009
	13	Corgi	EU408265	Webb and Allard 2009
	9	Cairn Terrier	EU408264	Webb and Allard 2009
	3	Cavalier King Charles Spaniel	EU408263	Webb and Allard 2009
	c-corgi	Cardigan Welsh Corgi	EU408260	Webb and Allard 2009
	chihuahua1	Chihuahua	EU408261	Webb and Allard 2009
	chihuahua2	Chihuahua	EU408262	Webb and Allard 2009
	cocapoo1	Cocapoo	EU408259	Webb and Allard 2009
	1	Cocapoo	EU408258	Webb and Allard 2009
	4	Brittany Spaniel	EU408257	Webb and Allard 2009
	13	Basset Hound	EU408256	Webb and Allard 2009
	13	Basset Hound	EU408255	Webb and Allard 2009
	13	Basset Hound	EU408254	Webb and Allard 2009
	3	Boxer	EU408253	Webb and Allard 2009
	13	Bolognese	EU408252	Webb and Allard 2009
	3	Greyhound	JN182093	This study
	3	Greyhound	JN182094	This study
	10	Greyhound	JN182095	This study
	3	Greyhound	JN182096	This study
	13	Poodle	JN182097	This study
	8	Irish Setter	JN182098	This study
	6	Irish Red and White Setter	JN182099	This study
	2	German Shepherd	JN182100	This study
	2	German Shepherd	JN182101	This study
	3	German Shepherd	JN182102	This study
	2	German Shepherd	JN182103	This study
	2	German Shepherd	JN182104	This study
	ger-shepherd8,10	German Shepherd	JN182105	This study
	3	German Shepherd	JN182106	This study
	ger-shepherd8,10	German Shepherd	JN182107	This study
	2	German Shepherd	JN182108	This study
	2	German Shepherd	JN182109	This study
	2	German Shepherd	JN182110	This study
	2	German Shepherd	JN182111	This study
	2	German Shepherd	JN182112	This study
	2	German Shepherd	JN182113	This study
	doberman2	Doberman Pincher	JN182114	This study
	5	West Siberian Laika	JN182115	This study
	husky3	Siberian Husky	JN182116	This study
	1	Polish Hunting Spaniel	JN182117	This study
	3	Canis familiaris isolate unknown	EU408304	Webb and Allard 2009
	cfam2	Canis familiaris isolate unknown	EU408303	Webb and Allard 2009
	2	Canis familiaris isolate unknown	NC_002008	Kim et al. 1998
	2	Canis familiaris isolate unknown	U96639	Kim et al. 1998
	cfam5	Canis familiaris isolate unknown	AY729880	Zhu et al. (unpublised)
	3	Canis familiaris unknown	JN182118	This study
	estdog2	Canis familiaris unknown	JN182119	This study
	estdog3	Canis familiaris unknown	JN182120	This study
Wolves	w1-2	unknown	NC_009686	Arnason et al. 2007
	w1-2	unknown	AM711902	Arnason et al. 2007
	w1russia	Russia	DQ480503	Bjornerfeldt, Webster and Vilà 2006
	w1sweden	Sweden	DQ480504	Bjornerfeldt, Webster and Vilà 2006
	w1spain	Spain	DQ480505	Bjornerfeldt, Webster and Vilà 2006
	w1s-arabia	Saudi Arabia	DQ480506	Bjornerfeldt, Webster and Vilà 2006
	w2s-arabia	Saudi Arabia	DQ480507	Bjornerfeldt, Webster and Vilà 2006
	w1canada	Canada	DQ480508	Bjornerfeldt, Webster and Vilà 2006
	14	Estonia	JN182019	This study
	14	Estonia	JN182020	This study
	14	Estonia	JN182021	This study
	14	Estonia	JN182022	This study
	14	Estonia	JN182023	This study
	14	Estonia	JN182024	This study
	14	Estonia	JN182025	This study
	14	Estonia	JN182026	This study
	14	Estonia	JN182027	This study
	14	Estonia	JN182028	This study
	14	Estonia	JN182029	This study
	14	Estonia	JN182030	This study
	14	Estonia	JN182031	This study
	14	Estonia	JN182032	This study
	14	Estonia	JN182033	This study
	14	Estonia	JN182034	This study
	14	Estonia	JN182035	This study
	14	Estonia	JN182036	This study
	14	Estonia	JN182037	This study
	14	Estonia	JN182038	This study
	14	Estonia	JN182039	This study
	14	Estonia	JN182040	This study
	14	Estonia	JN182041	This study
	14	Estonia	JN182042	This study
	14	Estonia	JN182043	This study
	14	Estonia	JN182044	This study
	14	Estonia	JN182045	This study
	14	Estonia	JN182046	This study
	14	Estonia	JN182047	This study
	14	Estonia	JN182048	This study
	14	Estonia	JN182049	This study
	14	Estonia	JN182050	This study
	14	Estonia	JN182051	This study
	14	Estonia	JN182052	This study
	14	Estonia	JN182053	This study
	14	Estonia	JN182054	This study
	14	Estonia	JN182055	This study
	14	Latvia	JN182056	This study
	14	Latvia	JN182057	This study
	w3latvia	Latvia	JN182058	This study
	14	Latvia	JN182059	This study
	14	Latvia	JN182060	This study
	14	Latvia	JN182061	This study
	14	Latvia	JN182062	This study
	12	Latvia	JN182063	This study
	14	Latvia	JN182064	This study
	12	Latvia	JN182065	This study
	14	Latvia	JN182066	This study
	14	Latvia	JN182067	This study
	12	Latvia	JN182068	This study
	14	Latvia	JN182069	This study
	12	Latvia	JN182070	This study
	14	Latvia	JN182071	This study
	14	Latvia	JN182072	This study
	14	Latvia	JN182073	This study
	14	Latvia	JN182074	This study
	14	Latvia	JN182075	This study
	14	Latvia	JN182076	This study
	12	Latvia	JN182077	This study
	14	Latvia	JN182078	This study
	12	Latvia	JN182079	This study
	14	Latvia	JN182080	This study
	12	Latvia	JN182081	This study
	12	Latvia	JN182082	This study
	12	Latvia	JN182083	This study
	14	Latvia	JN182084	This study
	14	Latvia	JN182085	This study
	14	Latvia	JN182086	This study
	w32latvia	Latvia	JN182087	This study
	14	Latvia	JN182088	This study
	12	Latvia	JN182089	This study
	14	Latvia	JN182090	This study
	14	Latvia	JN182091	This study
	14	Latvia	JN182092	This study
Wolf-dog hybrids	Ehy 1-6	Estonia	JN182121	This study
		Estonia	JN182122	This study
		Estonia	JN182123	This study
		Estonia	JN182124	This study
		Estonia	JN182125	This study
		Estonia	JN182126	This study
	Lhy 1-2	Latvia	JN182127	This study
		Latvia	JN182128	This study
